# Supplementary material
Source: PubMed Central journal article supplement (PMC11062614)

**Clonal hematopoiesis of indeterminate potential with loss of *Tet2* enhances risk for atrial fibrillation through macrophage mediated *Nlrp3* inflammasome activation**

**Uncropped Gel Blots**

Representative figure lanes enclosed within dashed box

# Full Unedited Gel for Figure 2G

## Nlrp3

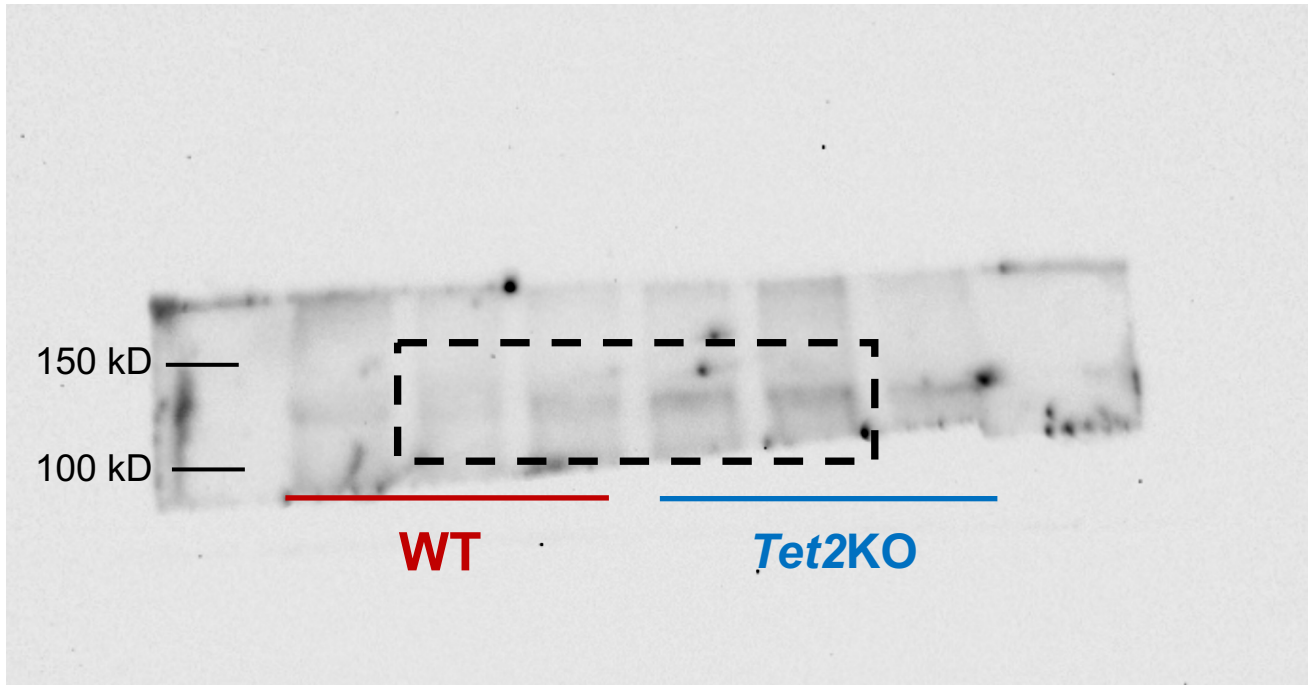

## Vinculin

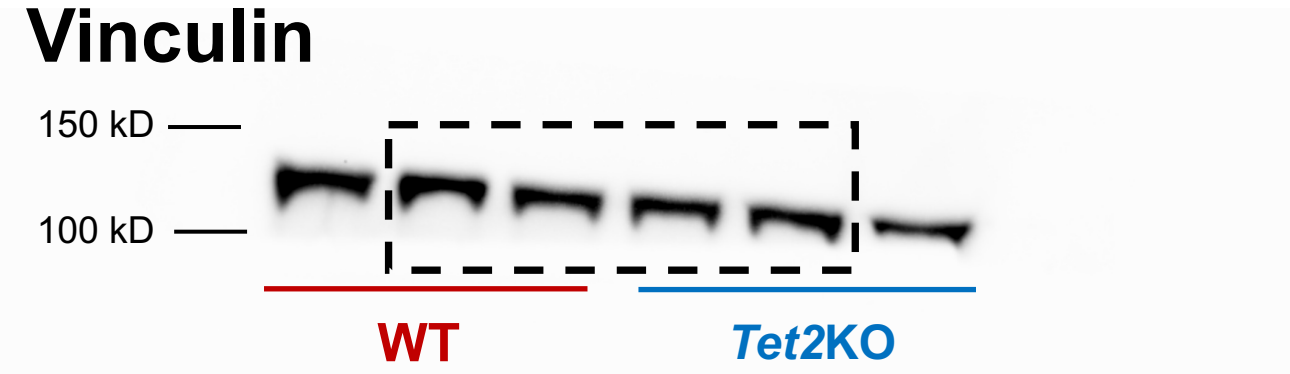

# Full unedited gel for Figure 5B

## pCaMKII

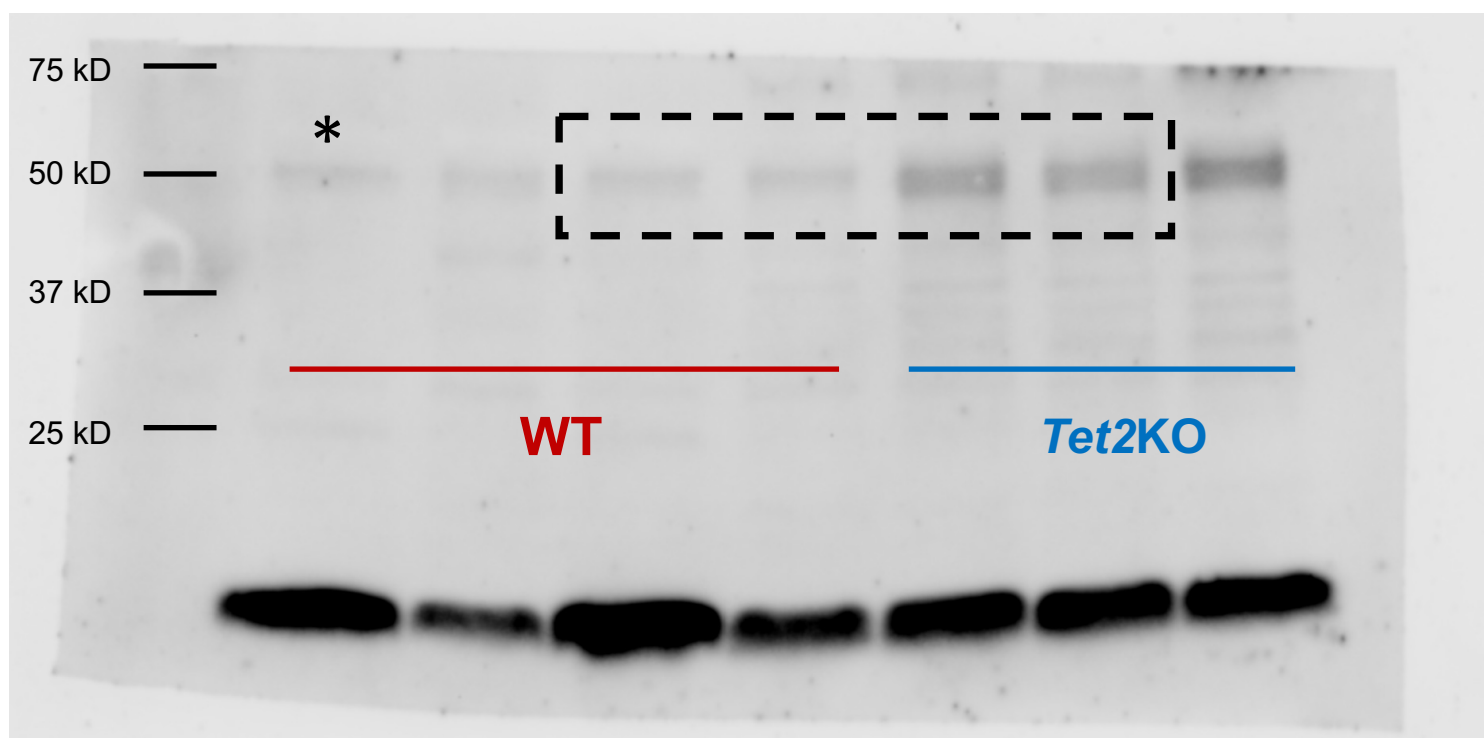

## Vinculin

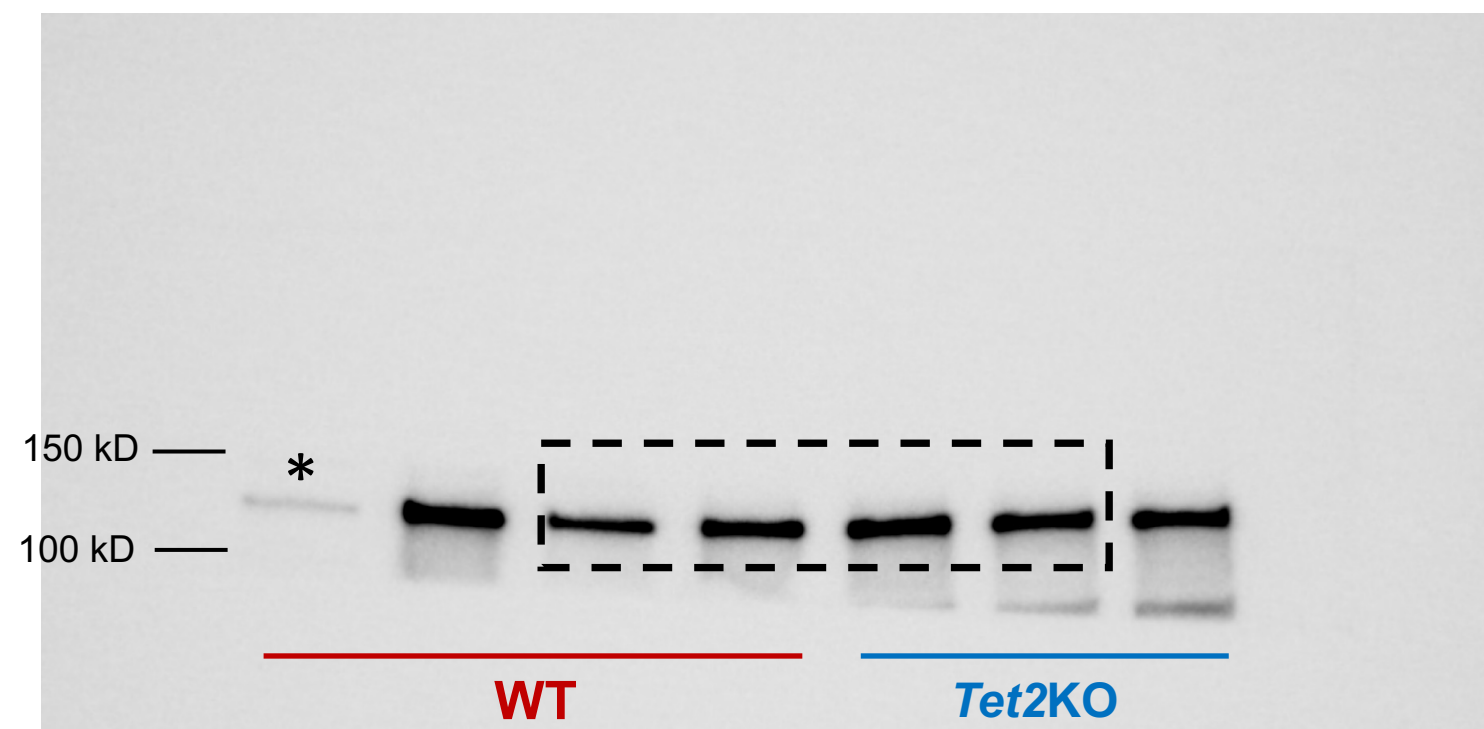

\* Erroneous loading, excluded in quantitation.

# Full unedited gel for Figure 5C

## pCaMKII

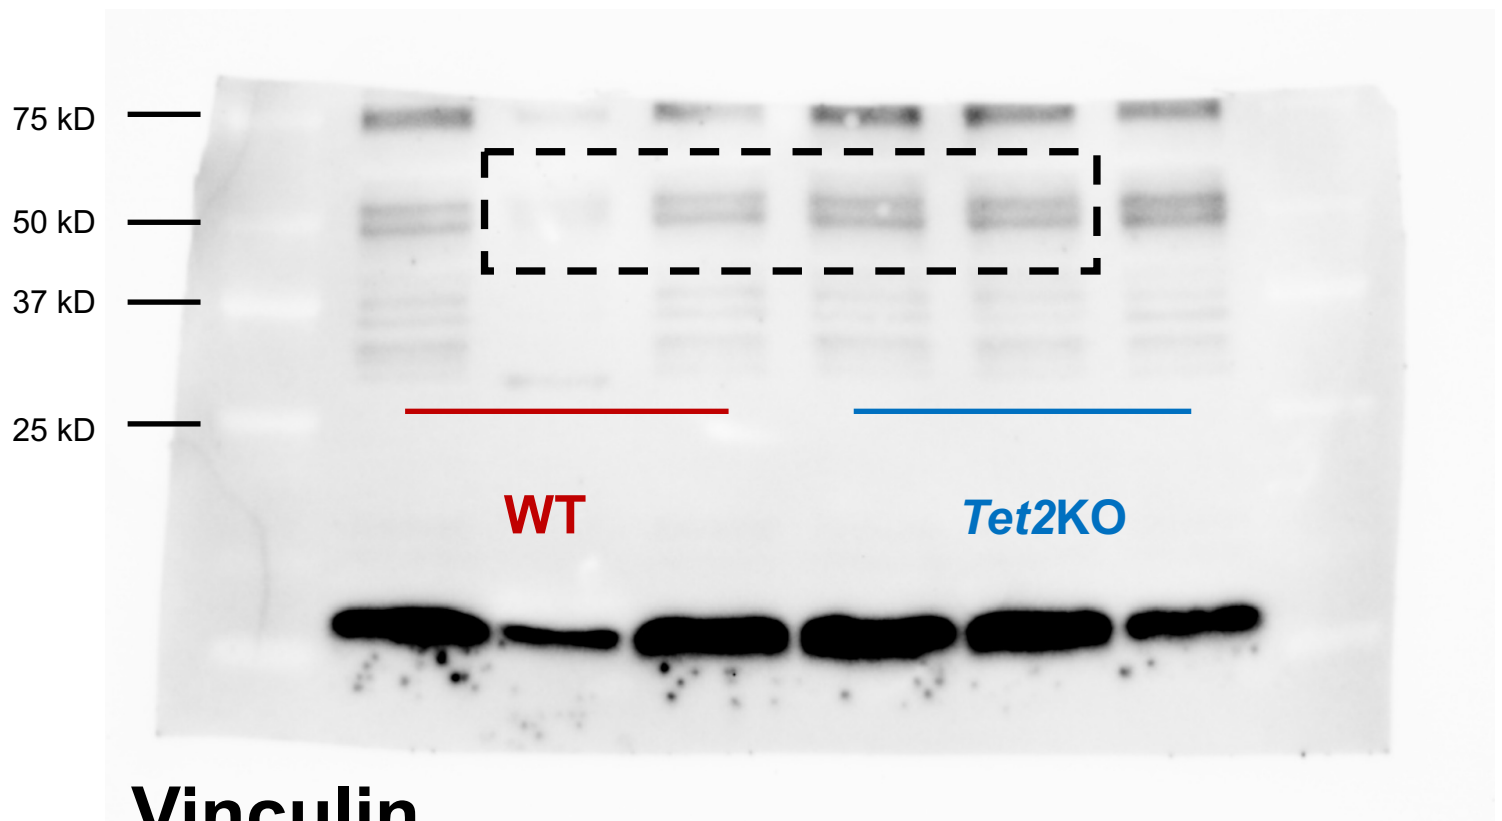

## Vinculin

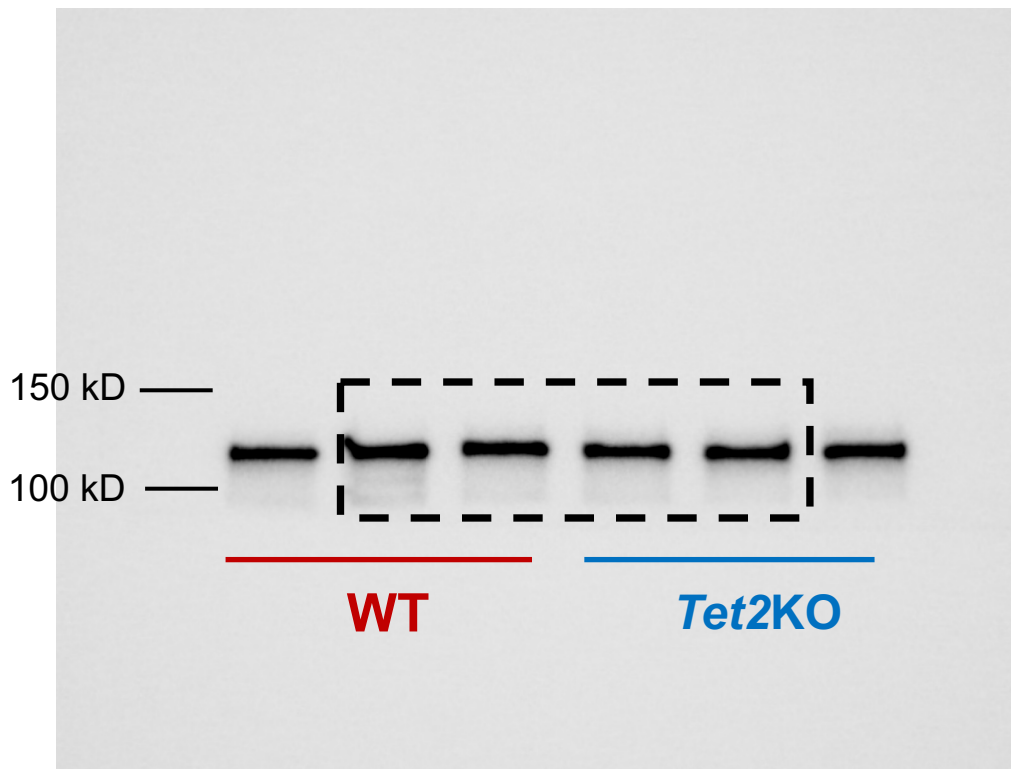

# Full unedited gel for Supp. Figure 6A

## Caspase 1 + p20

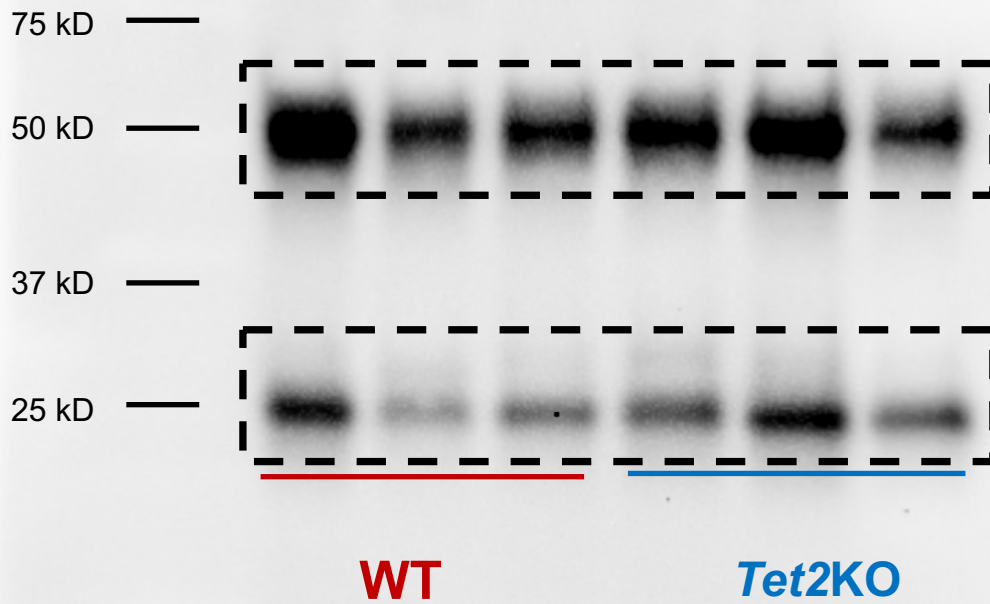

## ASC

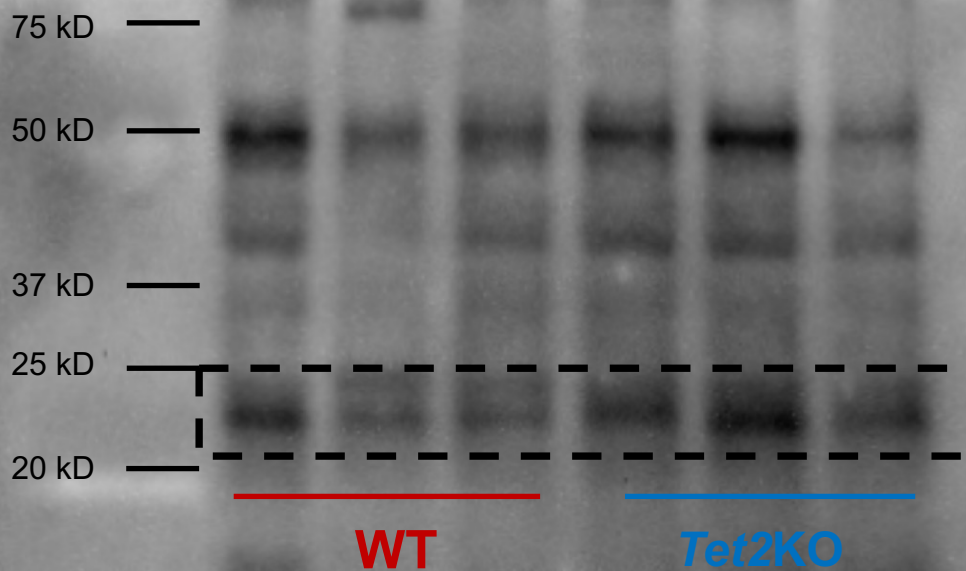

# Full unedited gel for Supp. Figure 6A (cont'd)

## Vinculin

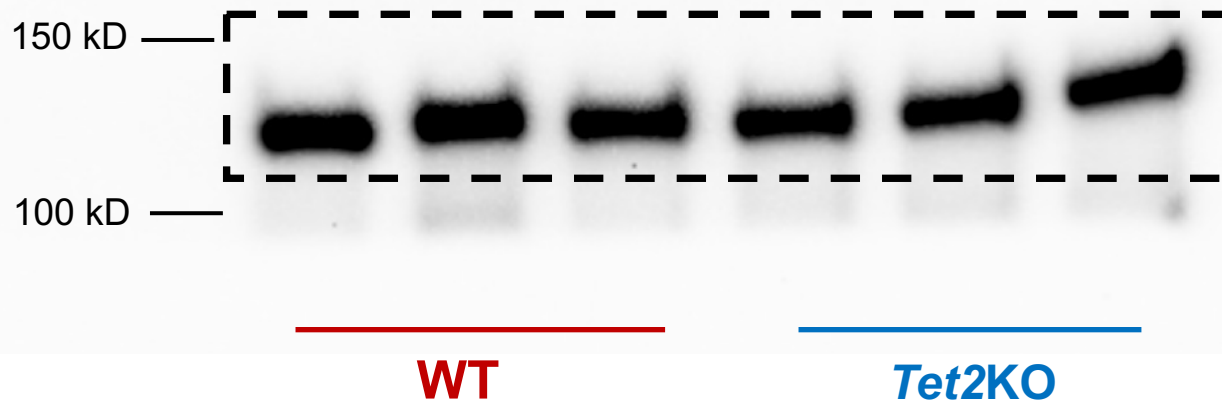

# Full unedited gel for Supp. Figure 6B

## Caspase 1 + p20

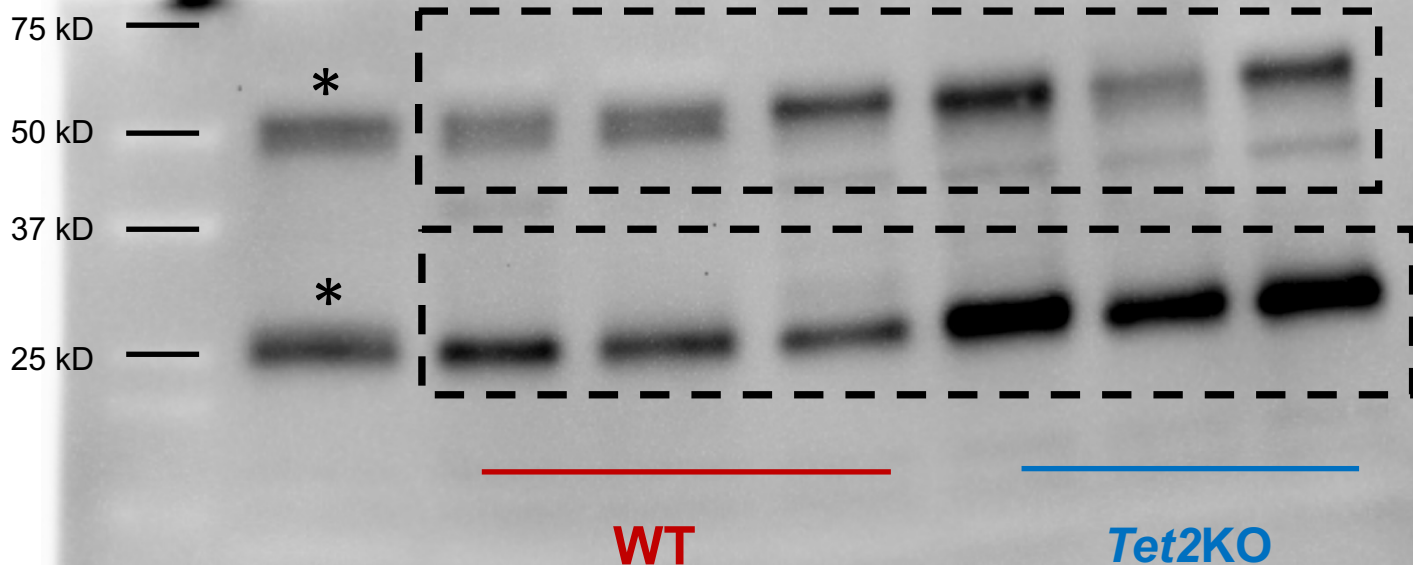

## Nlrp3

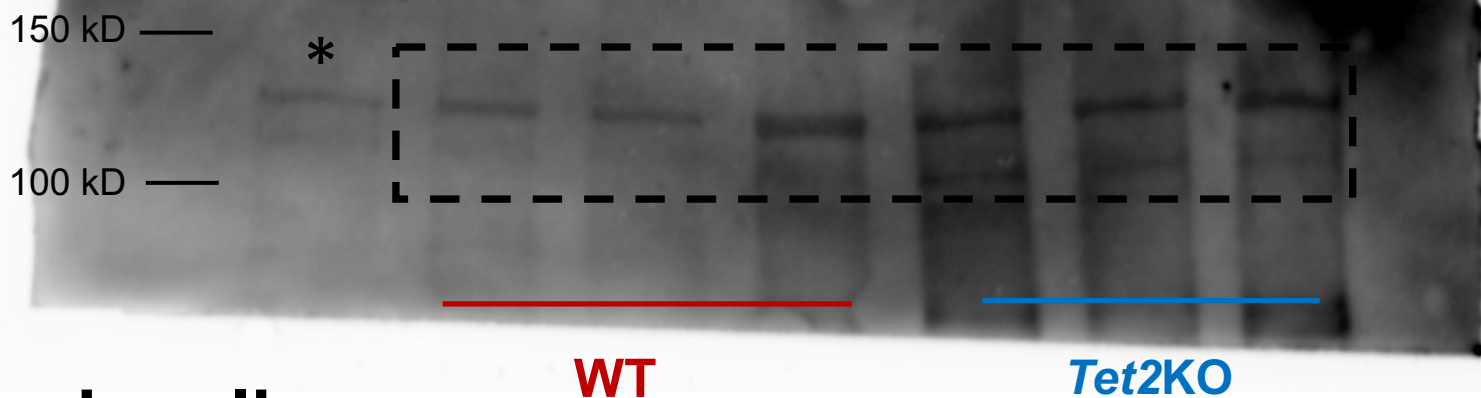

## vinculin

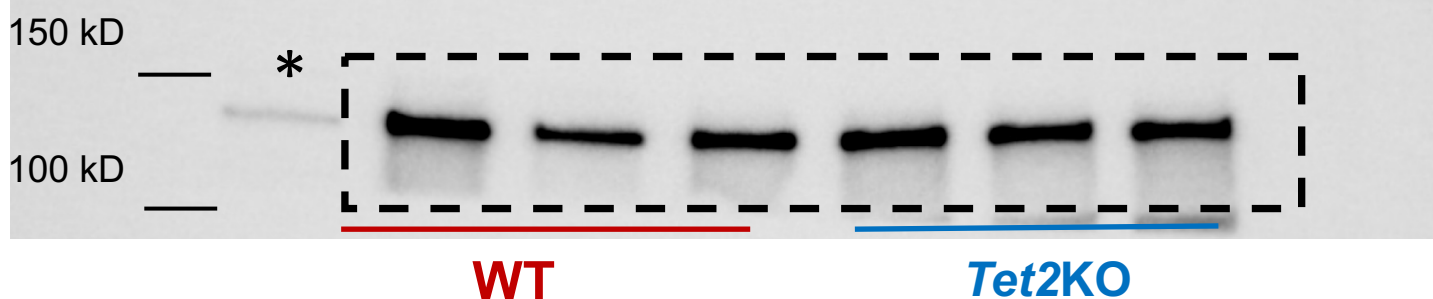

\* Erroneous loading, excluded in quantitation.

# Full unedited gel for Supp. Figure 6B (cont'd)

## ASC

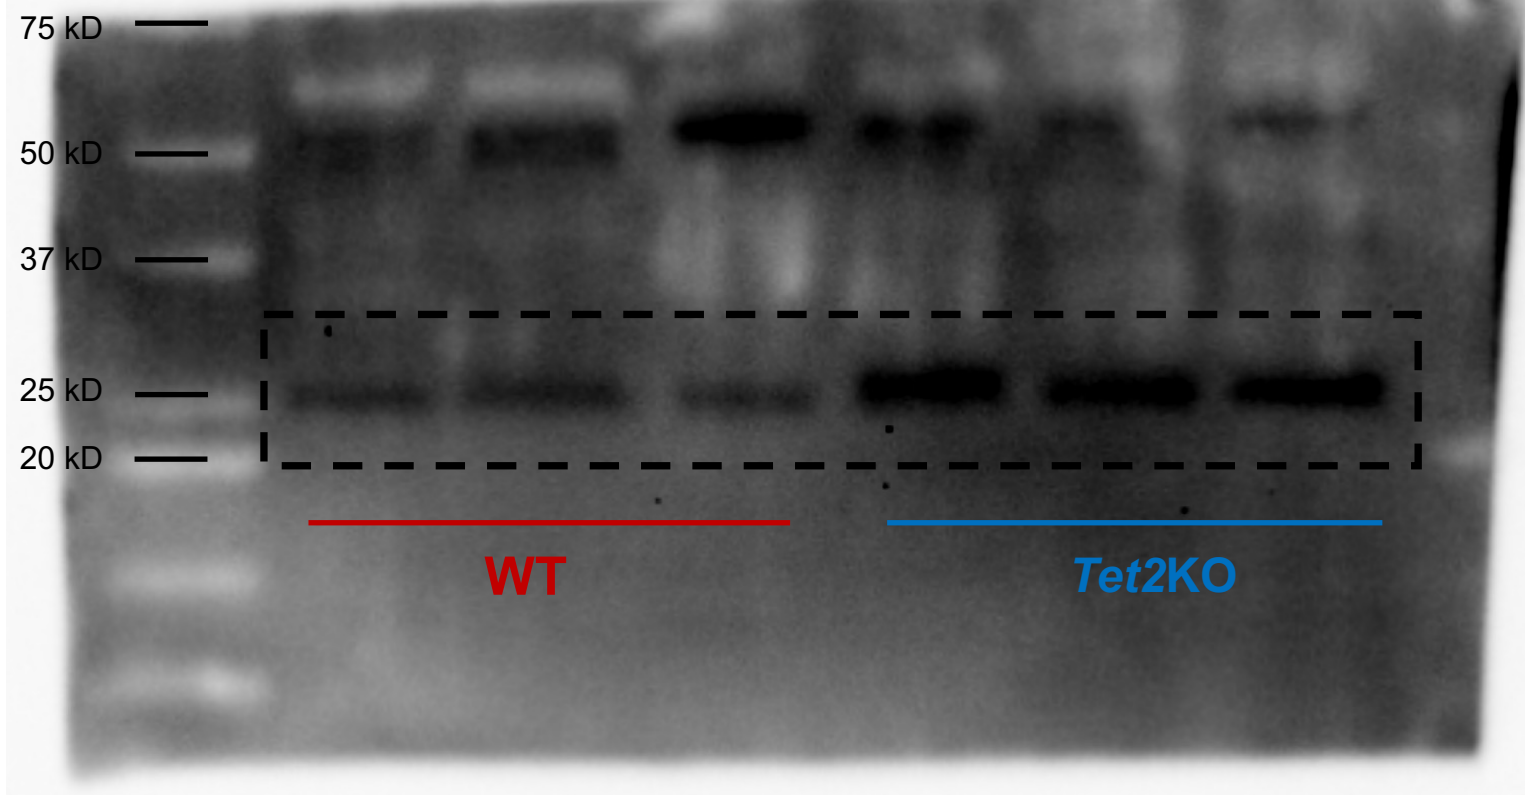

## Vinculin

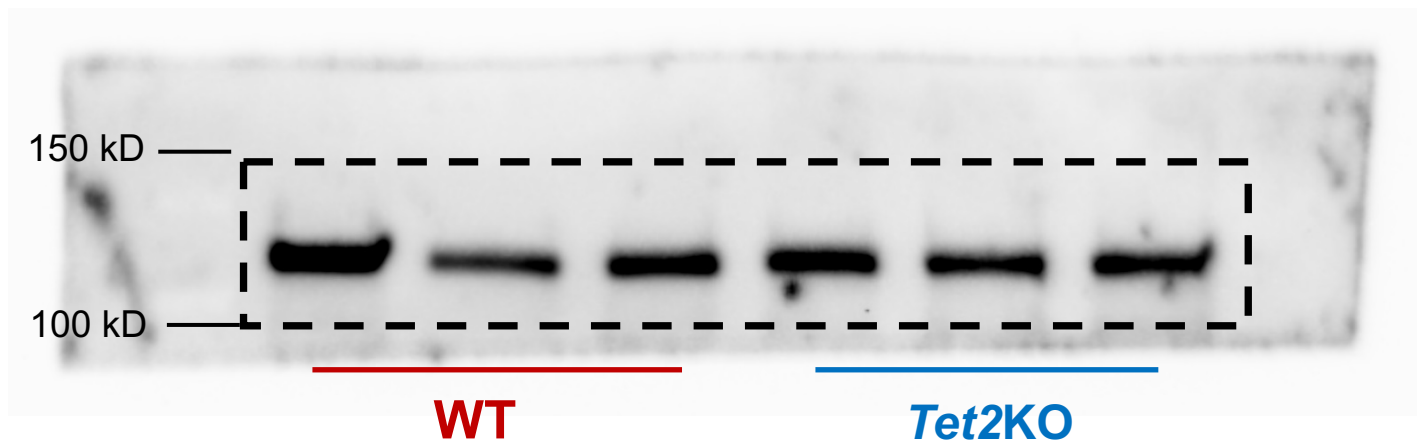



# Full Unedited Gel for Supp. Figure 6C

## Nlrp3

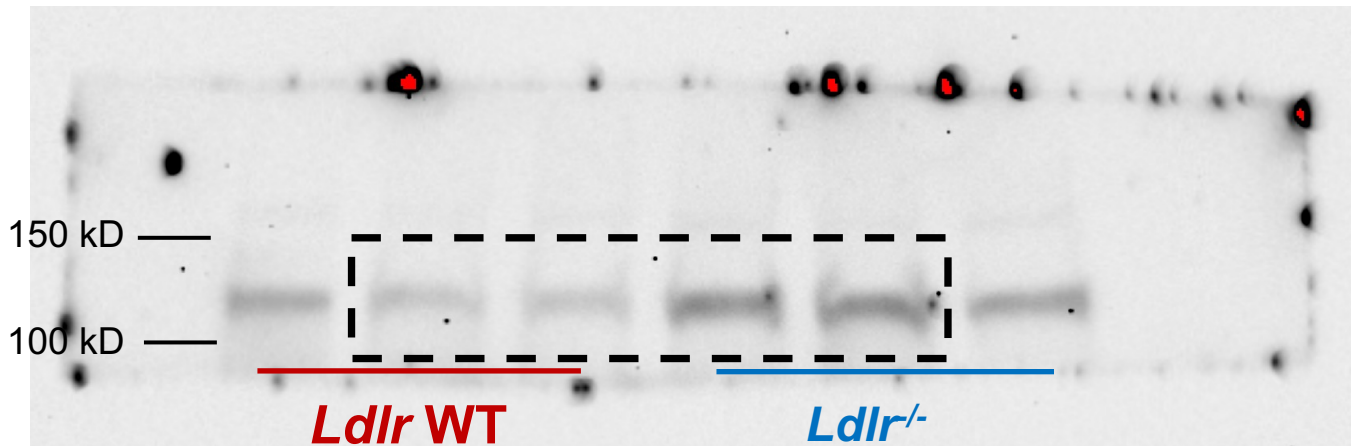

## Vinculin

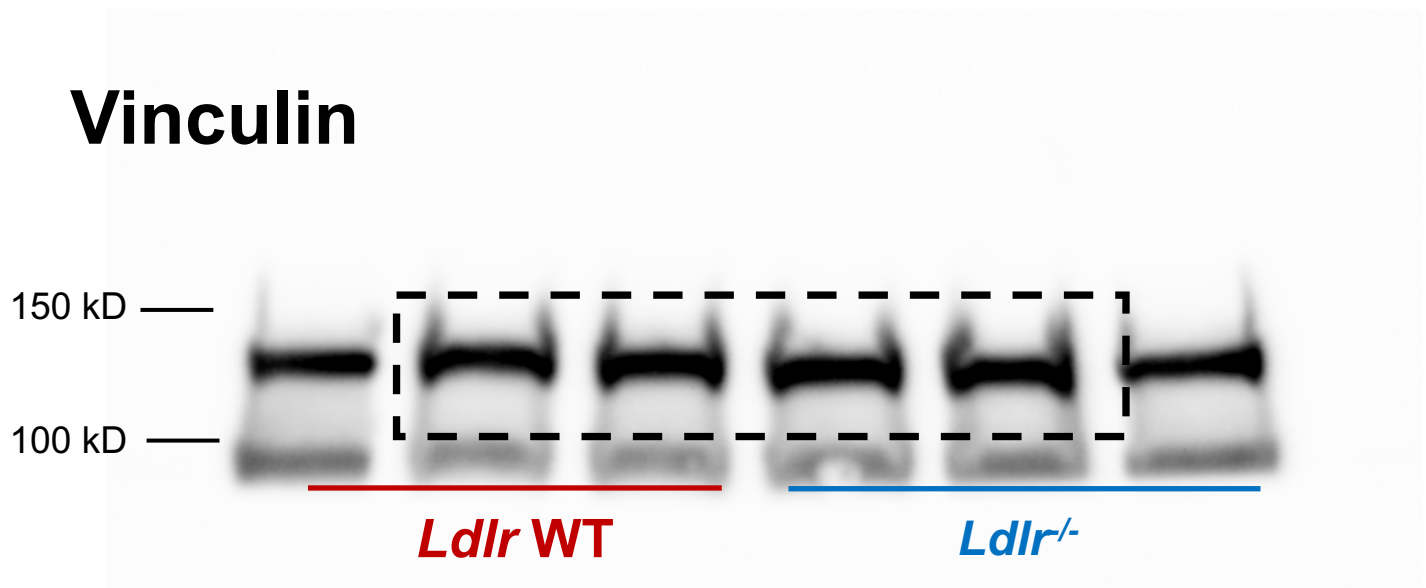

Supplement: cir-149-1419-s002.pdf [file cir-149-1419-s002.pdf]
