# Supplementary material
Source: PubMed Central journal article supplement (PMC11062614)
Supplement: cir-149-1419-s001.pdf [file cir-149-1419-s001.pdf]

# Clonal hematopoiesis of indeterminate potential with loss of *Tet2* enhances risk for atrial fibrillation through *Nlrp3* inflammasome activation

## Supplemental Materials

Expanded Methods

Figures S1-8

Supplemental Tables S1-3

Reference 70

## Expanded Methods

### *Mouse whole blood assay*

Mouse whole blood was collected in Li-Heparin tubes from C57BL/6J female mice, and diluted 1:1 in RPMI 1640+Glutamaxx (Gibco). Compound NP3-361 was diluted 1/3 in 90% DMSO (starting concentration 10mM) in 384-well plates resulting in a 12-point dilution titration and transferred into an empty assay plate using an ECHO555 (LabCyte). 40 mL of 50% mouse blood was added to wells. After a 60-minute incubation at 37°C, 5 mL of LPS crude (Sigma, L4391 10mg/mL diluted in RPMI 1640+Glutamaxx) was added and incubated for 4 hours before addition of 1mL ATP (Sigma A2383, 150mM in PBS, pH7.2). After 30 min incubation at 37°C, plates were centrifuged (1000 x g, 5min), and 10μL of supernatant were transferred to an assay plate and IL-1β was detected by HTRF (CisBio) following manufacturers' instructions.  $IC_{50}$  values were calculated from the plot of percentage of inhibition vs the inhibitor concentration by a logistics fit according to:  $[y = A2 + (A1 - A2) / (1 + (x / IC_{50})^p)]$  where  $y$  is the %-inhibition at

the inhibitor concentration,  $x$ .  $A_1$  is the lowest inhibition value, i.e. 0 %, and  $A_2$  the maximum inhibition value, i.e. 100 %. The exponent,  $p$ , is the Hill coefficient.

### *Flow cytometry*

Peripheral blood was obtained by retro-orbital bleed into EDTA collection tubes. Red blood cells were lysed (ACK lysis buffer) from whole blood prior to flow cytometry analysis. Cell populations were analyzed using FACSCANTO II (BD). The antibodies (BioLegend) used for cell surface staining include : FITC anti-mouse CD45.1 (Ly5.1), PE anti-CD45.2, (104), PerCP/Cyanine5.5 anti-mouse CD3 (17A2), APC/Cyanine5.5 anti-mouse CD11b (M1/70), PacBlue anti-mouse Gr-1 (RB6-8C5), BV510 anti-mouse B220 (RA3-6B2), BV510 anti-mouse CD45.1 (A20), PacBlue anti-mouse/human CD11b (M1/70), PerCP/Cyanine 5.5 anti-mouse Ly-6G (1A8), APC-Cyanine7 anti-mouse Ly-6C (RB6-8C5), PeCy7 CD11c (N418), FITC anti-mouse F4/80 (BM8). Cells were stained for 30 min at 4C in 2% FBS/PBS (vol/vol) buffer and flow cytometry was performed using the BD FACSCantoII system and analyzed on FlowJo software.

### *Cardiac MRI*

MRI was performed with a 4.7-Tesla horizontal bore Pharmascan system (Bruker) equipped with a custom-built mouse cardiac coil (Rapid Biomedical) to obtain cine images of the left atrial and ventricular short axes. ECG and respiratory gating (SA Instruments), a gradient echo FLASH-sequence and a dedicated mouse cardiac volume coil in a bird cage design were used. Imaging parameters were as follows: time to echo (TE), 2.7 to 5 ms; 16 frames per RR interval (TR 7.0-15 ms depending on heart rate); in-plane resolution, 150x150  $\mu\text{m}$ ; slice thickness, 1 mm; NEX 4;

flip angle, 30 degrees. Anatomical and functional parameters were quantified using Horos software.

#### *Bone marrow isolation, transplantation, and bone marrow derived macrophages*

Recipient mice (CD45.1) aged 6-8 weeks were lethally irradiated with two doses of gamma-radiation (475cGy) at 3-hour intervals. Whole bone marrow was obtained from donor CD45.2 appropriate floxed mice with WT *Vav1-Cre*<sup>+</sup> controls. Isolated whole bone marrow cells were transplanted at  $2 \times 10^6$  cells per mouse using a retro-orbital intra-arterial approach. 4-5 weeks post-transplantation, confirmation of bone marrow reconstitution was evaluated by flow cytometry for CD45.2<sup>+</sup> donor peripheral blood cells. Reconstituted mice were fed WD for a minimum of 5 weeks. For *in vitro* bone marrow derived macrophage (BMDM) differentiation, isolated whole bone marrow cells were plated at 350,000 cells/cm<sup>2</sup> in Iscoves Media (Gibco) and 25ng/ml GM-CSF (Miltenyi) for 7 days. BMDMs were plated at  $1 \times 10^6$  cells/ml and incubated with cardiomyocytes and human IL-1 $\beta$  or IL-6 (InvivoGen) for 24 hours prior to calcium imaging studies.

#### *Immunoblotting*

Snap frozen atrial tissue samples were lysed using a Tissue Lyser (Qiagen) in protein lysis buffer supplemented with protease and phosphatase inhibitors (Boston BioProducts) and protein content was measured using a commercially available kit (DC Protein Assay, Bio-Rad). Equal amounts (15-25 mg) were treated with Laemmli buffer and  $\beta$ -mercaptoethanol and incubated at 100°C for 5 minutes. Lysate were electrophoresed on 4-20% SHS-polyacrylamide resolving gel and transferred to a PVDF membrane. The membrane was incubated overnight at 4° C with relevant

antibodies (NLRP3 (Invitrogen, 25N10E9), ASC (Santa Cruz, sc-514414), Caspase1(Santa Cruz, sc-56036), phosphoylated CamKII (Abcam 182647), vinculin (Sigma-Aldrich, V9264)), and then development was completed with secondary antibody for 2 hours at room temperature. Antibody signal detection was achieved by employing the Clarity Western ECL Substrate (BioRad #1705061). All protein quantification is relative to loading control (vinculin) and then normalized. A.U., arbitrary units. Imaging and image quantification were done via BioRad Chemidoc Touch Imaging System and ImageLab, respectively.

### *Histological analysis*

Hearts were perfused with PBS prior to isolation, fixed in 4% paraformaldehyde (PFA) overnight at 4°C then embedded in paraffin. Hematoxylin-eosin (H+E) and Masson's Trichrome staining were performed using standard protocols according to manufacturer's instructions (MilliporeSigma). Histology core labs include Brigham and Women's Hospital Histo-Pathology Core, Massachusetts General Hospital Histology core and iHisto Labs.

### *Cardiomyocyte isolation*

Atrial cardiomyocytes were isolated from adult mice using standard protocols<sup>17,20</sup>, where hearts were excised from ketamine/xylazine anesthetized mice, cannulated and perfused at 37°C at 3ml/min with calcium free buffer and digested with collagenase II. Hearts were manually dissected, and isolated cardiomyocytes were seeded on laminin coated plates in M199 medium (supplemented with 5% fetal bovine calf serum and 2,3 butanedione monoxime) for 1 hour.

### *Cardiomyocyte stem cell differentiation*

Human pluripotent stem cells (hPSC, WA07 [H7], WiCell), were maintained in Essential 8 Medium on Geltrex extracellular matrix (Invitrogen) using feeder-free conditions. The hPSCs were then maintained in RPMI 1640/B-27 without insulin (Invitrogen) with Geltrex (1:100) and stimulated over 24 hours with CHIR00921 (10uM; Stemgent). Supplementation with retinoic acid (ATRA 1  $\mu$ M) was used for atrial differentiation. Differentiation and maintenance of cells was performed as previously described with minor modifications for atrial differentiation.<sup>70</sup> hPSC atrial cardiomyocytes (hPSC-aCM) were incubated with human recombinant IL-1 $\beta$  and IL-6 (Miltenyi Biotech), at 10ng/ml for 24 hours.

**A**

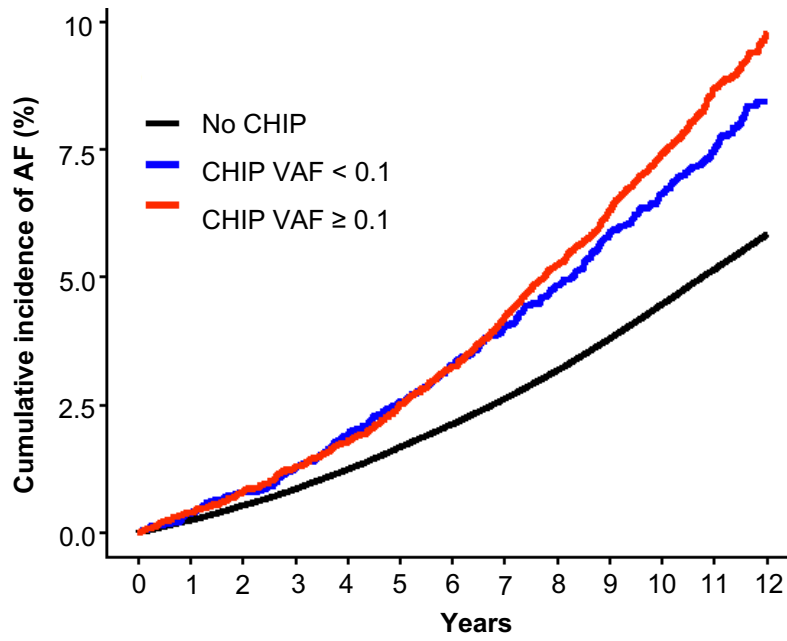

**B**

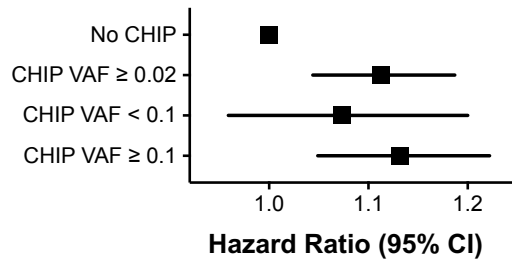

**C**

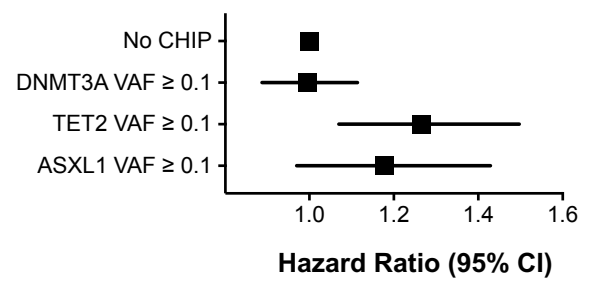

|  | Group                | AF           | HR (95% CI)          | P       |
|--|----------------------|--------------|----------------------|---------|
|  | No CHIP              | 345513 17620 |                      |         |
|  | CHIP VAF $\geq$ 0.02 | 12584 1000   | 1.113 (1.044, 1.187) | 0.00101 |
|  | CHIP VAF < 0.1       | 4223 311     | 1.073 (0.959, 1.2)   | 0.22    |
|  | CHIP VAF $\geq$ 0.1  | 8361 689     | 1.132 (1.049, 1.222) | 0.00142 |

|  | Group                        | AF           | HR (95% CI)          | P       |
|--|------------------------------|--------------|----------------------|---------|
|  | No CHIP                      | 345513 17620 |                      |         |
|  | <i>DNMT3A</i> VAF $\geq$ 0.1 | 4695 324     | 1.02 (0.914, 1.139)  | 0.781   |
|  | <i>TET2</i> VAF $\geq$ 0.1   | 1433 143     | 1.27 (1.077, 1.498)  | 0.00442 |
|  | <i>ASXL1</i> VAF $\geq$ 0.1  | 997 107      | 1.176 (0.972, 1.422) | 0.0956  |

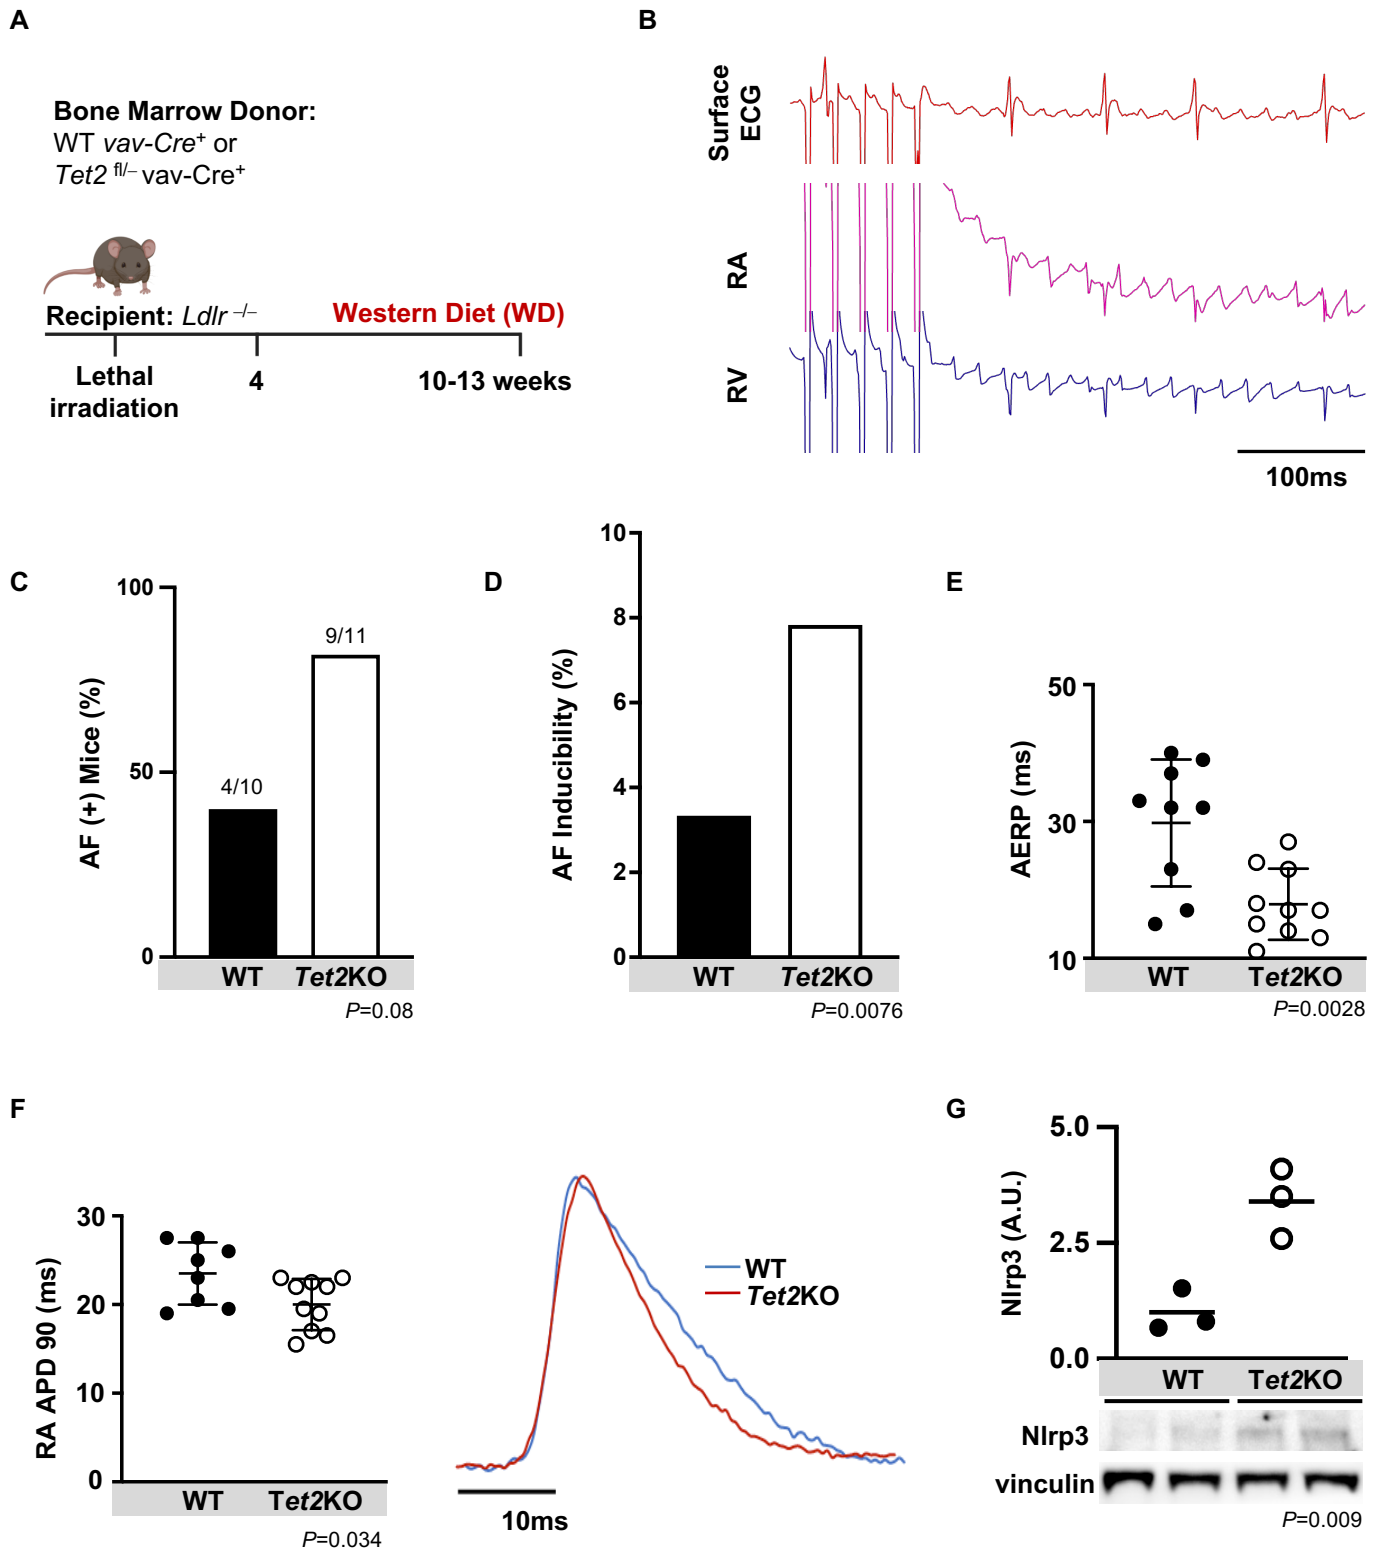

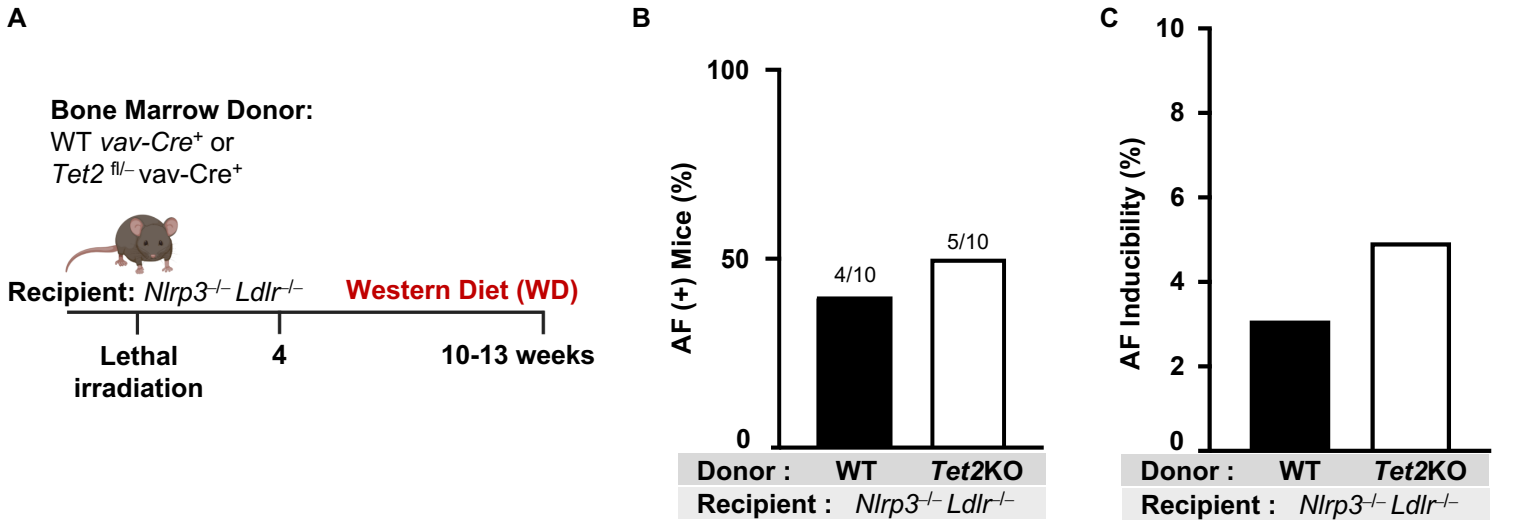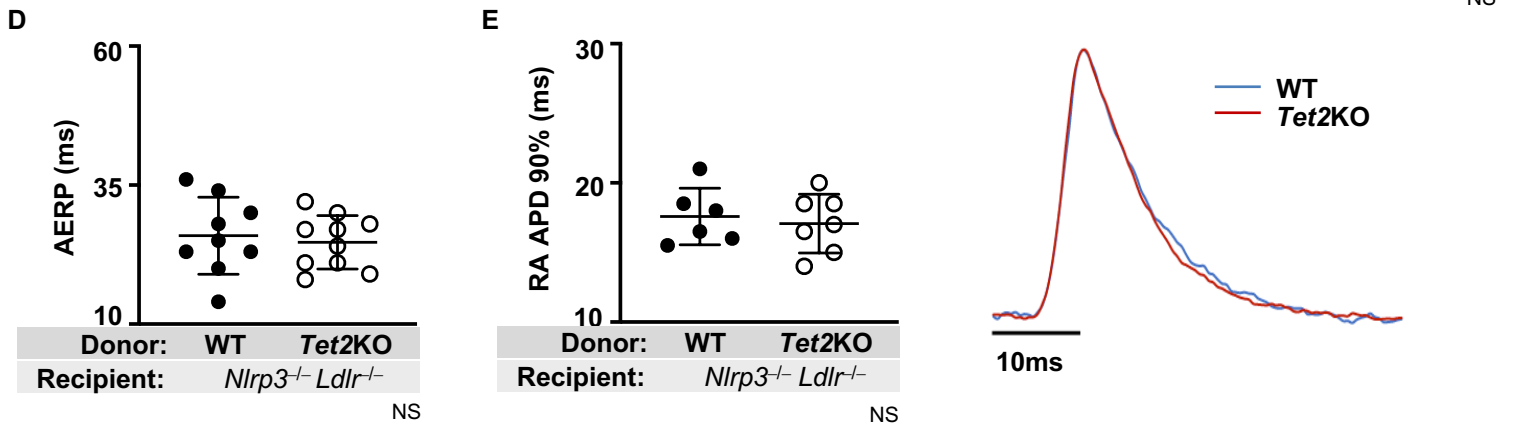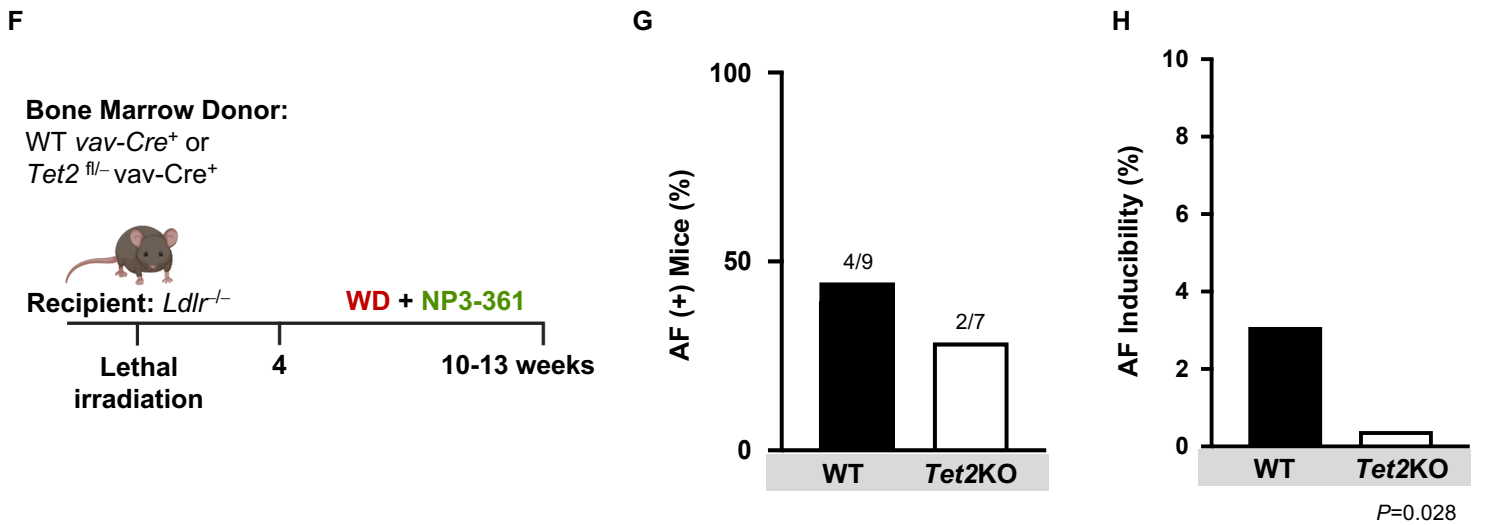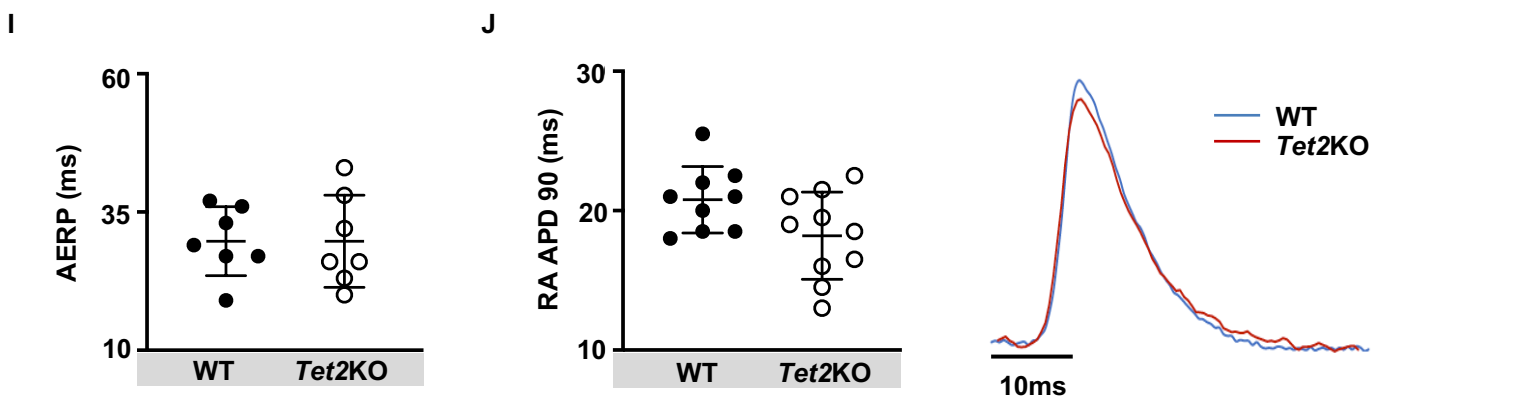



A

**Bone Marrow Donor:**WT *vav-Cre*<sup>+</sup> or  
*Tet2*<sup>-/-</sup> *vav-Cre*<sup>+</sup>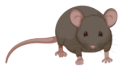Recipient: *Ldlr* WT (CD45.1)

Western Diet (WD)

Lethal irradiation

4

10-13

&gt;44 weeks

B

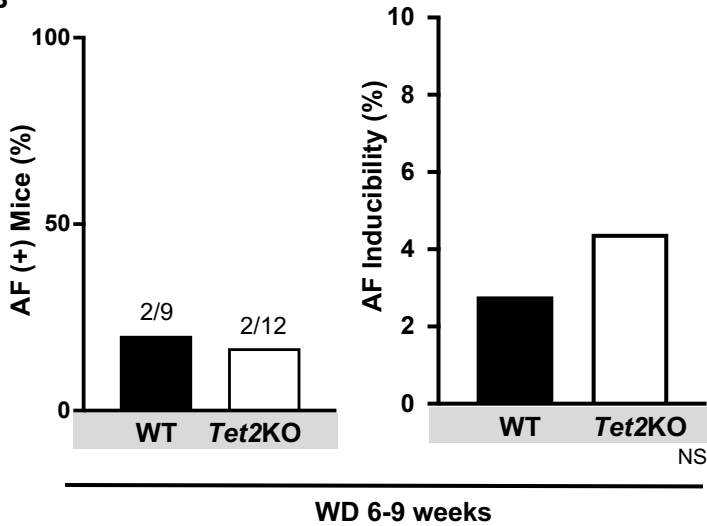

C

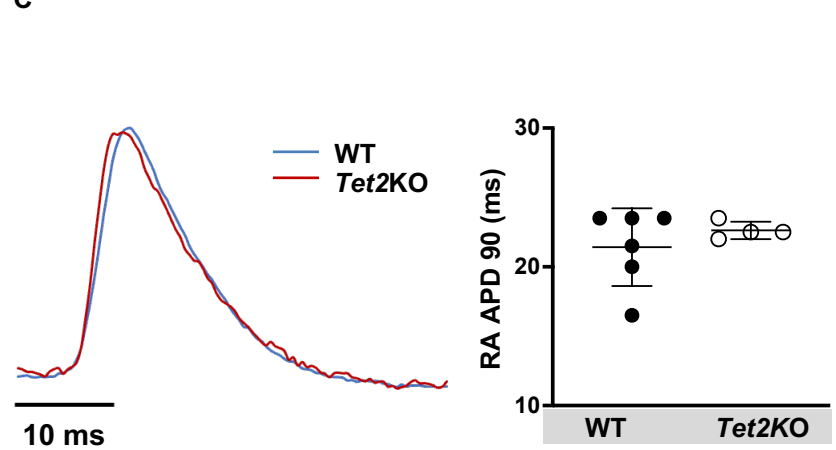

D

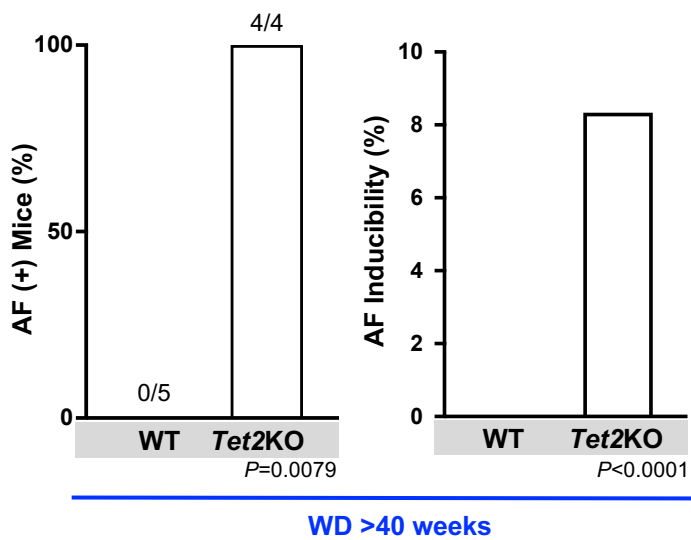

E

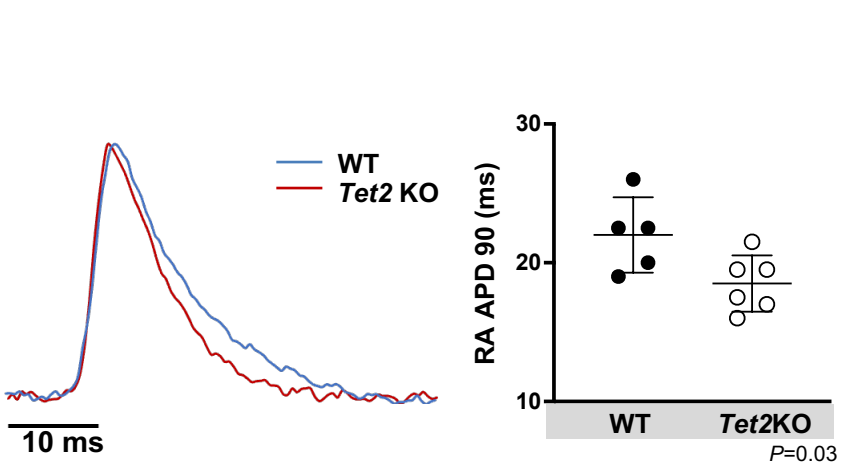

F

**Bone Marrow Donor:***Tet2*<sup>-/-</sup> *vav-Cre*<sup>+</sup>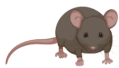

Western diet (WD)

Recipient: *Ldlr* WT or *Nlrp3*<sup>-/-</sup>

Lethal irradiation

4

&gt;44 weeks

G

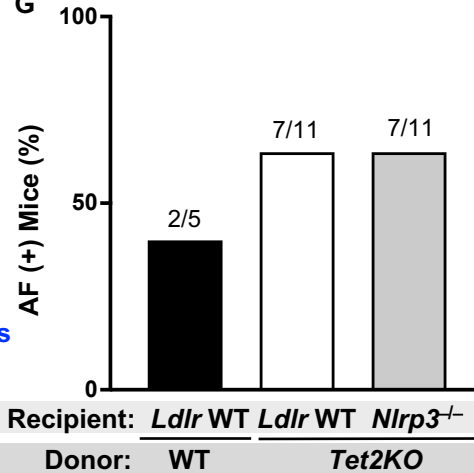

H

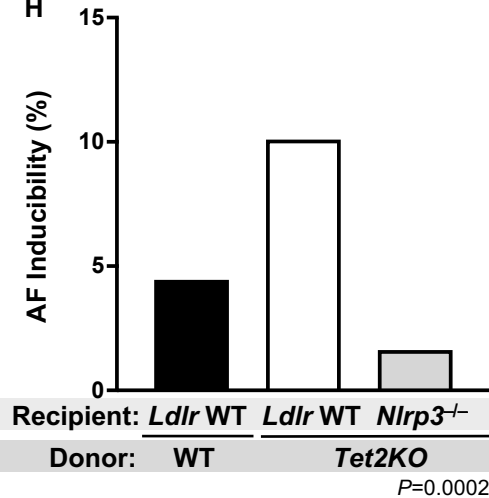

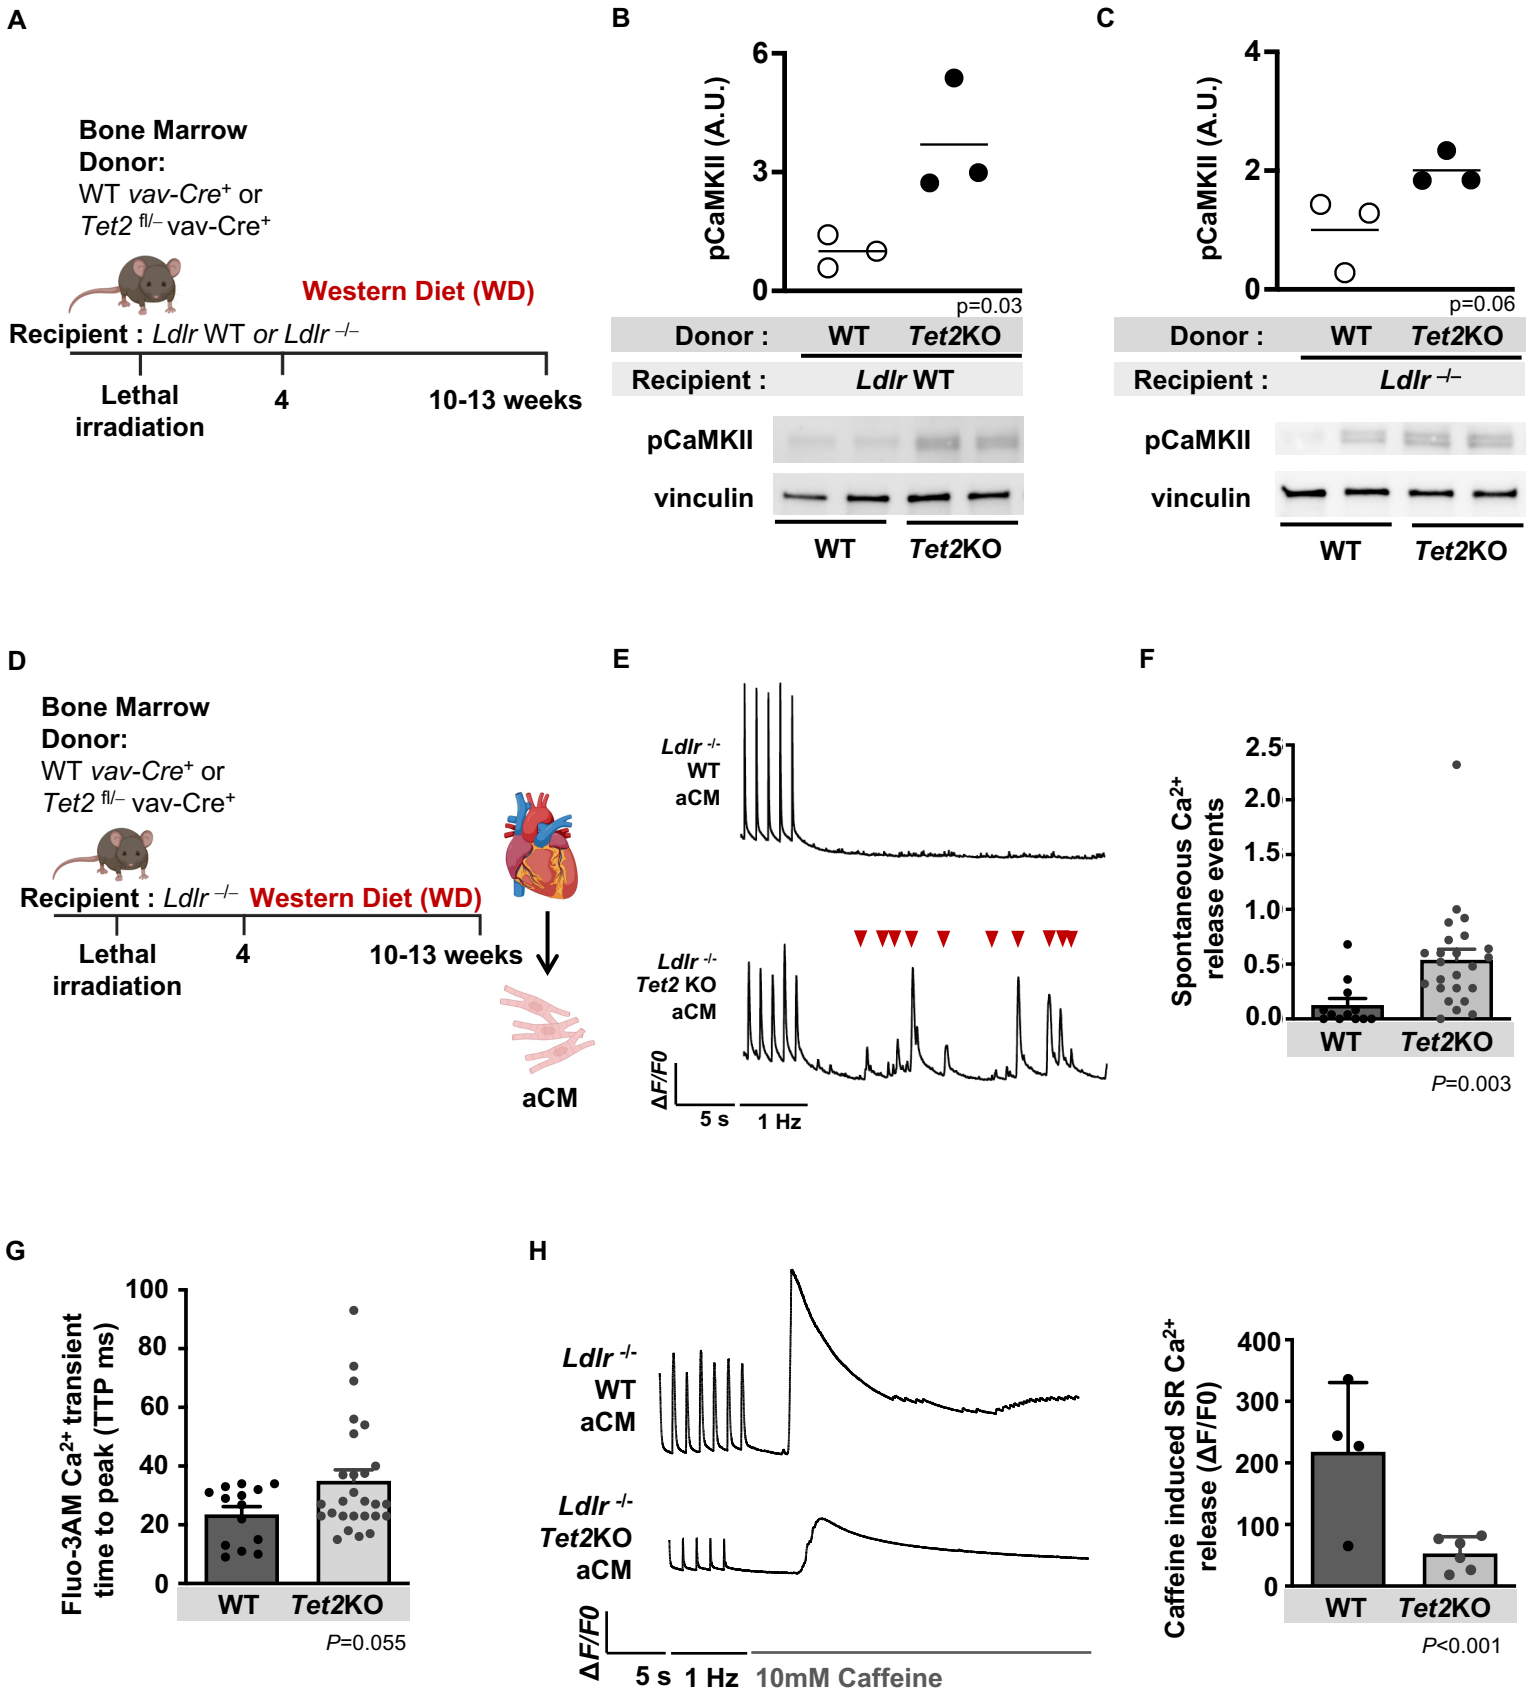

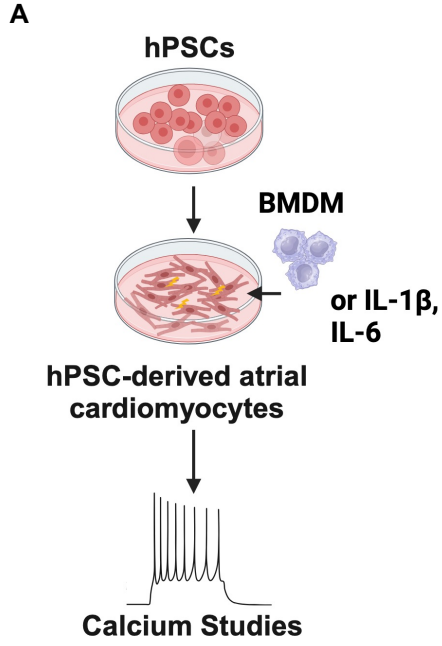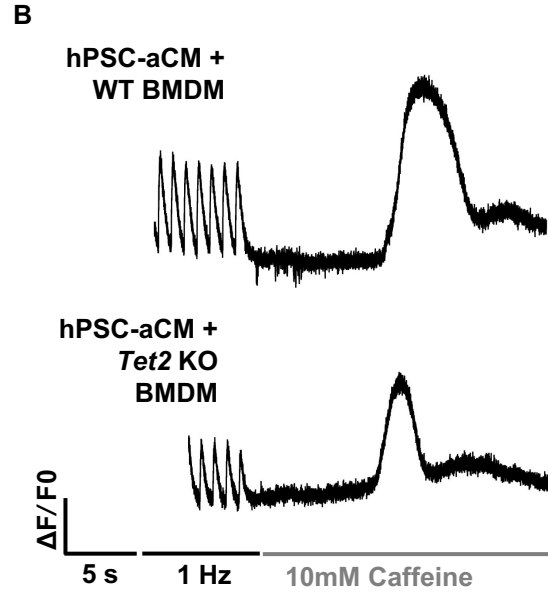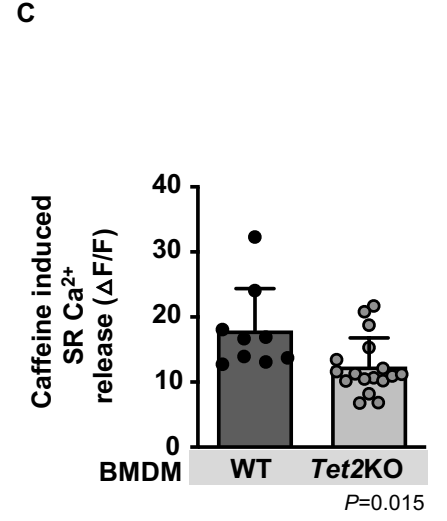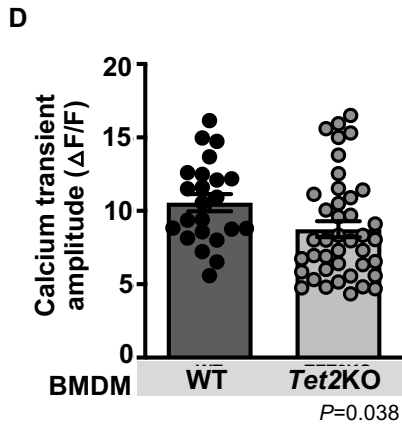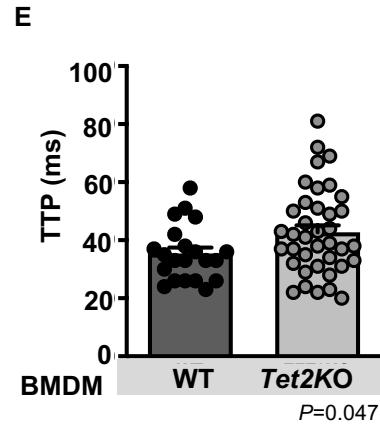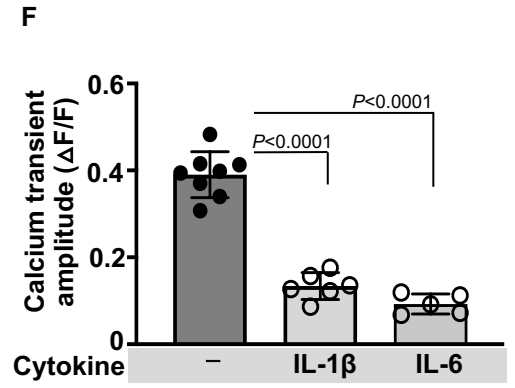

| <b>Name</b>                                  | <b>ICD-10</b>                                           | <b>ICD-9</b>                                                               | <b>OPSC-4</b>                           |
|----------------------------------------------|---------------------------------------------------------|----------------------------------------------------------------------------|-----------------------------------------|
| <b>AF/Aflutter</b>                           | I48, I48.0, I48.1, I48.2 I48.3<br>I48.4 I48.9           | 427.31, 427.32                                                             |                                         |
| <b>Ablation</b>                              |                                                         |                                                                            | K57.1,<br>K62.1, K62.2,<br>K62.3, K62.4 |
| <b>Heart Failure</b>                         | 398.91, 428, 428.1, 428.2,<br>428.3, 428.4, 428.9       | I09.81, I50, I50.1, I50.2, I50.3,<br>I50.4, I50.8, I50.9                   |                                         |
| <b>Mitral stenosis</b>                       | I34.0, I05.0, I05.1, I05.2,<br>I05.8, I08, I08.8, I08.9 | 424.0, 394.0, 394.1, 394.2,<br>394.9, 396.1, 396.2, 396.3,<br>396.8, 396.9 |                                         |
| <b>Myeloproliferative<br/>neoplasm (MPN)</b> | D45, D46.9, D471.1, D47.3                               | 207.1, 238.5 238.6, 238.7                                                  |                                         |
| <b>Myeloid leukemia</b>                      | C92, C92.0, C92.1, C92.3,<br>C92.4, C92.5, C92.7, C92.9 | 202.8, 203, 204.1 205.1, 205.2,<br>205.3, 205.8, 205.9, V10.6              |                                         |

**Supplemental Table 1. *International Classification of Diseases, Ninth and 10th Revisions* (ICD-9, ICD-10) codes and Office of Population Censuses and Surveys Classification of Interventions and Procedures-4 (OPCS-4) codes in UK Biobank.**

|                                      | <b>WT</b> | <b><i>Tet2</i>KO</b> | <b><i>P</i></b> |
|--------------------------------------|-----------|----------------------|-----------------|
| <b>CD45.1</b>                        | 955       | 689                  | 0.22            |
| <b>CD45.2</b>                        | 12826     | 12355                | 0.81            |
| <b>CD45.2<sup>+</sup> neutrophil</b> | 388       | 230                  | 0.06            |
| <b>CD45.2<sup>+</sup> macrophage</b> | 5817      | 6421                 | 0.68            |
| <b>CD45.2<sup>+</sup> monocyte</b>   | 321       | 185                  | 0.067           |

**Supplemental Table 2. Donor hematopoietic stem cells re-populate the atria.**

Lethally irradiated *Ldlr*<sup>-/-</sup> mice transplanted with WT or hematopoietic-specific inactivation of *Tet2* (*Tet2*KO) bone marrow were fed WD for 6-9 weeks followed by isolation of atria and tissue digest for single cell suspension (4500U/ml collagenase I, 125U/ml collagenase XI, 60U/ml DNaseI, 60U/ml hyaluronidase). Pooled digest of atria were characterized by flow cytometry (FACS Cantoll, BD Bioscience). Donor hematopoietic cells are CD45.2<sup>+</sup>, recipient hematopoietic cells are CD45.1<sup>+</sup>. Neutrophils are CD11b<sup>+</sup> Ly6G<sup>hi</sup>, macrophages are CD11b<sup>+</sup> Ly6G<sup>lo</sup> F4/80<sup>hi</sup>, monocytes are CD11b<sup>+</sup> Ly6G<sup>hi</sup> F4/80<sup>lo</sup>. Statistical test: Two-tailed Student's t-test for all comparisons. KO indicates knockout; TET2, tet methylcystosine dioxygenase 2; WD, Western diet; and WT, wild-type.

| Parameter               | Conduction     | WT ( $\pm$ SD)   | Tet2KO ( $\pm$ SD) | P     |
|-------------------------|----------------|------------------|--------------------|-------|
| Surface ECG             | QRS (ms)       | 27 $\pm$ 2.6     | 28 $\pm$ 2.4       | 0.26  |
|                         | PR (ms)        | 47.6 $\pm$ 6.6   | 47.6 $\pm$ 5.6     | 0.98  |
|                         | BCL (ms)       | 128.9 $\pm$ 15.5 | 128 $\pm$ 10.6     | 0.88  |
| Basic Electrophysiology | WCL (1:1) (ms) | 76.1 $\pm$ 1.7   | 78.4 $\pm$ 6.1     | 0.26  |
|                         | 2:1 CL (ms)    | 56.2 $\pm$ 3.8   | 58.7 $\pm$ 5.8     | 0.09  |
|                         | SNRT (80) (ms) | 181.6 $\pm$ 25.4 | 189.5 $\pm$ 51.6   | 0.67  |
|                         | AERP (ms)      | 29.78 $\pm$ 9.28 | 17.9 $\pm$ 5.3     | 0.003 |
|                         | AV ERP (ms)    | 46.1 $\pm$ 5.6   | 48 $\pm$ 8.9       | 0.59  |
|                         | V ERP (ms)     | 28 $\pm$ 5.8     | 28 $\pm$ 4         | 1.00  |
| Optical Mapping         | RA CV (m/s)    | 0.68 $\pm$ 0.22  | 0.525 $\pm$ 0.09   | 0.06  |
|                         | LA CV (m/s)    | 0.68 $\pm$ 0.20  | 0.887 $\pm$ 0.24   | 0.16  |
|                         | RA APD50 (ms)  | 12.7 $\pm$ 2.01  | 10.35 $\pm$ 1.66   | 0.015 |
|                         | RA APD70 (ms)  | 19.5 $\pm$ 3.22  | 16.53 $\pm$ 2.65   | 0.047 |
|                         | RA APD90 (ms)  | 23.31 $\pm$ 3.40 | 20 $\pm$ 2.89      | 0.04  |

**Supplemental Table 3. Hematopoietic-specific loss of *Tet2* does not alter cardiac conduction.**

Lethally irradiated *Ldlr*<sup>-/-</sup> mice transplanted with WT or hematopoietic-specific inactivation of *Tet2* (*Tet2*KO) bone marrow were fed WD for 6-9 weeks followed by terminal EPS and optical mapping. Mean  $\pm$  standard deviation (SD) shown. Statistical test: Two-tailed Student's t-test for all comparisons. AERP indicates atrial effective refractory period; APD, action potential duration. AV, atrio-ventricular; BCL, basic cycle length; CV, conduction velocity; CL, cycle length; EPS, electrophysiology studies; KO, knockout; LA, left atrial; RA, right atrial; SNRT, sinus node recovery time; TET2, tet methylcystosine dioxygenase 2; WD, WCL, Wenckebach cycle length; Western diet; and WT, wild-type.
